# Supplementary material for: Genetic Modifiers and Rare Mendelian Disease
Source: PubMed Central journal article supplement (PMC7140819; doi:10.3390/genes11030239), 2020-02-25
Supplement: genes-11-00239-s001.pdf [file genes-11-00239-s001.pdf]

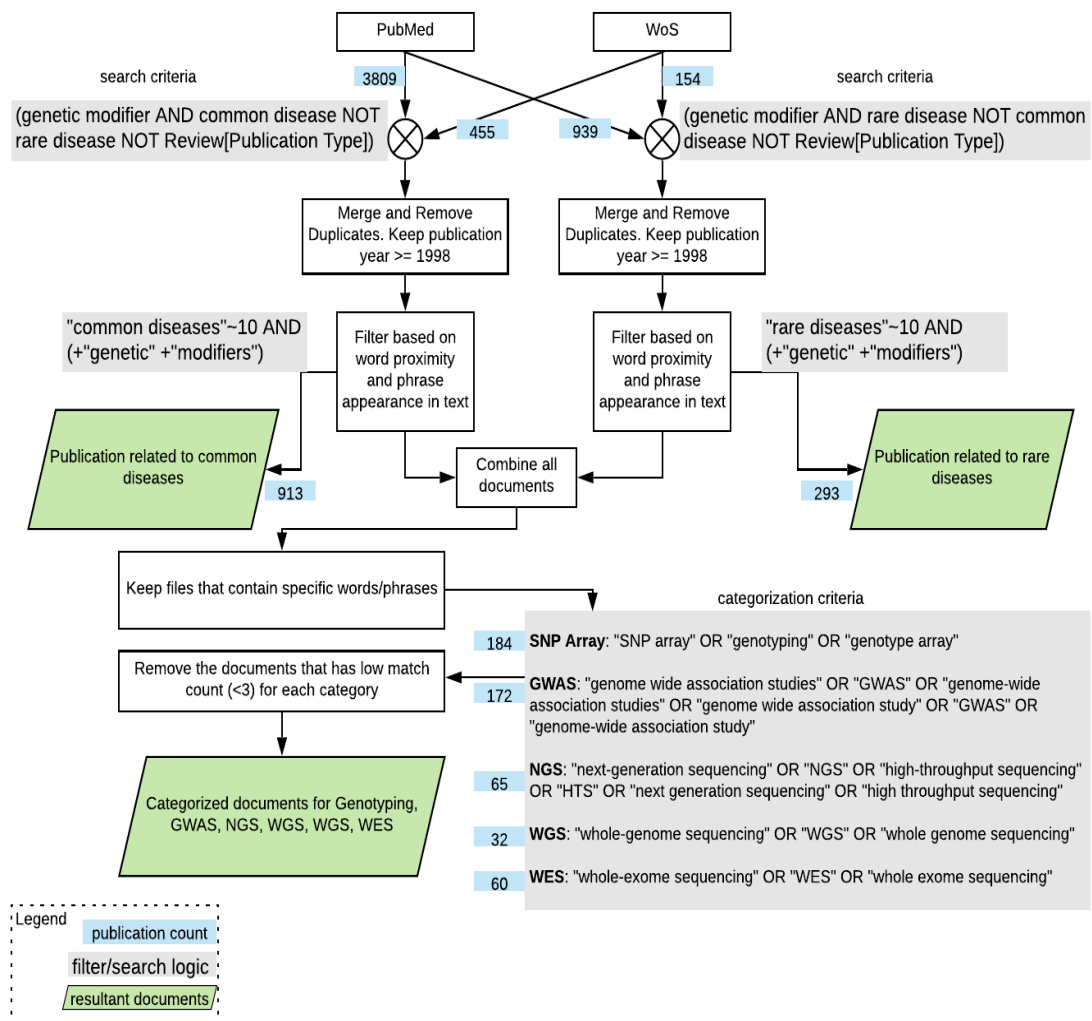

**Figure S1.** Schematic diagram of the literature review and the textual analysis process. Textual analysis is performed using NVivo 12 plus.
